# Supplementary material for: Effects of high-intensity virtual reality therapy on coordination and quality of life in BPPV patients: A randomized clinical trial
Source: Research Square preprint supplement (doi:10.21203/rs.3.rs-6999386/v1), 2025-07-10
Supplement: Supplementary file 1 [file 5b6d3a9a154be768420471ce.docx]

| **Table 4** Time comparisons by group. | | | | | | | | | | | | |
| --- | --- | --- | --- | --- | --- | --- | --- | --- | --- | --- | --- | --- |
| Variable | BET (n=20) | | | VES (n=20) | | | EXE (n=20) | | | CON (n=20) | | |
| Overall change | Pre to Post | Post to Follow-up | Overall change | Pre to Post | Post to Follow-up | Overall change | Pre to Post | Post to Follow-up | Overall change | Pre to Post | Post to Follow-up |
| MMSE | χ2(2) =11.556  *P* =.003  W =.289 | Z =-2.157  *P* =.031  r =-.34 | NS | χ2(2) =13.455  *P* =.001  W =.336 | Z =-2.414  *P* =.016  r =-.38 | NS | χ2(2) =25.200  *P* <.001  W =.630 | Z =-3.105  *P* =.002  r =-.49 | NS | χ2(2) =12.182  *P* =.002  W =.305 | Z =-2.292  *P* =.022  r =-.36 | NS |
| Beck Dep. | NS | NS | NS | χ2(2) =12.343  *P* =.002  W =.309 | Z =-3.048  *P* =.002  r =-.48 | NS | χ2(2) =33.446  *P* <.001  W =.836 | Z =-3.885  *P* <.001  r =-.61 | NS | χ2(2) =18.521  *P* <.001  W =.463 | Z =-2.030  *P* =.042  r =-.32 | Z =-2.254  *P* =.024  r =-.36 |
| EQ5D | χ2(2) =25.200  *P* <.001  W =.630 | Z =-3.535  *P* <.001  r =-.56 | NS | χ2(2) =30.952  *P* <.001  W =.774 | Z =-3.794  *P* <.001  r =-.60 | Z =-2.309  *P* =.021  r =-.37 | χ2(2) =37.200  *P* <.001  W =.930 | Z =-4.064  *P* <.001  r =-.64 | NS | χ2(2) =24.500  *P* <.001  W =.613 | Z =-3.624  *P* <.001  r =-.57 | NS |
| BBS | NS | NS | NS | χ2(2) =28.000  *P* <.001  W =.700 | Z =-3.811  *P* <.001  r =-.60 | NS | χ2(2) =34.507  *P* <.001  W =.863 | Z =-3.929  *P* <.001  r =-.62 | NS | NS | NS | NS |
| 6MWT (m) | χ2(2) =23.474  *P* <.001  W =.587 | NS | Z =-3.597  *P* <.001  r =-.57 | χ2(2) =29.368  *P* <.001  W =.734 | Z =-2.173  *P* =.030  r =-.34 | Z =-3.526  *P* <.001  r =-.56 | χ2(2) =33.189  *P* <.001  W =.830 | Z =-3.794  *P* <.001  r =-.60 | Z =-3.365  *P* =.001  r =-.53 | χ2(2) =22.026  *P* <.001  W =.551 | NS | Z =-3.527  *P* <.001  r =-.56 |
| VAP | χ2(2) =19.444  *P* <.001  W =.486 | NS | Z =-3.411  *P* =.001  r =-.54 | χ2(2) =38.316  *P* <.001  W =.958 | Z =-3.922  *P* <.001  r =-.62 | Z =-3.524  *P* <.001  r =-.56 | χ2(2) =35.558  *P* <.001  W =.889 | Z =-3.925  *P* <.001  r =-.62 | Z =-3.493  *P* =.001  r =-.55 | χ2(2) =28.597  *P* <.001  W =.715 | Z =-2.336  *P* =.020  r =-.37 | Z =-3.642  *P* <.001  r =-.58 |
| DGI | χ2(2) =19.897  *P* <.001  W =.497 | Z =-2.790  *P* =.005  r =-.44 | Z =-2.121  *P* =.034  r =-.34 | χ2(2) =29.200  *P* <.001  W =.730 | Z =-3.741  *P* <.001  r =-.59 | NS | χ2(2) =38.839  *P* <.001  W =.971 | Z =-3.944  *P* <.001  r =-.62 | NS | χ2(2) =20.694  *P* <.001  W =.517 | Z =-3.264  *P* =.001  r =-.52 | NS |
| Fn | NS | NS | NS | χ2(2) =10.364  *P* =.006  W =.259 | Z =-2.530  *P* =.011  r =-.40 | NS | χ2(2) =12.167  *P* =.002  W =.304 | Z =-2.652  *P* =.008  r =-.42 | NS | NS | NS | NS |
| Sway NEO | NS | NS | NS | χ2(2) =11.200  *P* =.004  W =.280 | NS | NS | χ2(2) =12.700  *P* =.002  W =.318 | Z =-3.547  *P* <.001  r =-.56 | NS | χ2(2) =6.462  *P* =.040  W =.162 | Z =-2.069  *P* =.039  r =-.33 | NS |
