# Supplementary material for: Effects of high-intensity virtual reality therapy on coordination and quality of life in BPPV patients: A randomized clinical trial
Source: Research Square preprint supplement (doi:10.21203/rs.3.rs-6999386/v1), 2025-07-10
Supplement: Supplementary file 2 [file 60189eefc97f0ab16823222a.docx]

| **Table 3** Group comparisons FOLLOW-UP. | | | | | | ND | Result of Group Comparison |
| --- | --- | --- | --- | --- | --- | --- | --- |
| Variable | BET (n=20) | VES (n=20) | EXE (n=20) | CON (n=20) | All (N=80) |
| Mean±SD | Mean±SD | Mean±SD | Mean±SD | Mean±SD |
| MMSE | 29.5±.76 | 29.3±.57 | 29.7±.49 | 29.6±.76 | 29.5±.66 | no | NS |
| Beck Dep. | 10.8±1.62 | 9.0±1.59 | 6.6±1.64 | 10.2±1.31 | 9.1±2.22 | no | H =41.493  *P* <.001  η2[H] = .51 |
| EQ5D | 73.3±7.66 | 76.5±4.89 | 89.0±3.08 | 74.3±7.12 | 78.3±8.65 | no | H =44.892  *P* <.001  η2[H] = .55 |
| BBS | 41.0±2.96 | 50.0±3.10 | 54.5±1.61 | 41.6±2.44 | 46.8±6.27 | no | H =62.139  *P* <.001  η2[H] = .78 |
| 6MWT (m) | 419.5±51.96 | 429.5±37.06 | 458.0±55.02 | 420.0±34.18 | 431.8±47.30 | no | NS |
| VAP | 30.2±4.12 | 15.1±3.37 | 10.8±3.22 | 29.1±4.29 | 21.3±9.32 | no | H =62.604  *P* <.001  η2[H] = .78 |
| DGI | 20.9±1.17 | 21.8±1.21 | 23.0±.86 | 20.8±.85 | 21.6±1.36 | no | H =34.893  *P* <.001  η2[H] = .42 |
| Fn | .3±.44 | .2±.37 | .1±.31 | .3±.47 | .2±.40 | no | NS |
| Sway WEO | 8.1±3.18 | 8.7±4.55 | 7.2±3.27 | 6.2±2.68 | 7.5±3.55 | yes | NS |
| Sway WEC | 12.8±4.00 | 10.1±4.23 | 8.3±3.63 | 9.1±2.70 | 10.1±4.00 | yes | F =5.615  *P* =.002  η2 = .18 |
| Sway NEO | 10.5±3.49 | 9.2±5.62 | 8.1±2.63 | 9.9±3.96 | 9.4±4.10 | yes | NS |
| Sway NEC | 14.9±4.16 | 12.4±4.51 | 9.2±3.23 | 10.8±3.21 | 11.8±4.30 | yes | F =8.097  *P* <.001  η2 = .24 |
| Abbreviations: BDI, Beck Depression Inventory; AHR BE , Average heart rate before exercise; SBP mmHg 15 MBT, Systole average 15 measurements before training; DBP mmHg 15 MBT, Dyastole average 15 measurements before training; DGI 1, Dynamic Gait Index 1; Fn, Falls number; BBS, Berg Balance Scale; VAP 1; BMI, body mass index; MMSE, Mini-Mental State Examination; NEC, COP path while standing in a narrow stance with eyes closed; NEO, COP path while standing in a narrow stance with eyes open; WEC, COP path while standing in a wide stance with eyes  closed; WEO, COP path while standing in a wide stance with eyes open; ND = Normal distribution (Kolmogorov-Smirnov teszt alapján)  *: significant difference between means  NS: not significant  BMI: Body Mass Index  AHR BE , Average heart rate before exercise  SBP mmHg 15 MBT: Systole average 15 measurements before training  DBP mmHg 15 MBT: Dyastole average 15 measurements before training  BBS: Berg Balance Scale  DGI 1: Dynamic Gait Index 1  Fn: Falls number  Data are expressed as mean +/- SD. | | | | | | | | |
