# Supplementary material for: Effects of high-intensity virtual reality therapy on coordination and quality of life in BPPV patients: A randomized clinical trial
Source: Research Square preprint supplement (doi:10.21203/rs.3.rs-6999386/v1), 2025-07-10
Supplement: Supplementary file 3 [file cce4a794bb25ccdcd040a74c.docx]

| **Table 2** Group comparisons POST. | | | | | | ND | Result of Group Comparison |
| --- | --- | --- | --- | --- | --- | --- | --- |
| Variable | BET (n=20) | VES (n=20) | EXE (n=20) | CON (n=20) | All (N=80) |
| Mean±SD | Mean±SD | Mean±SD | Mean±SD | Mean±SD |
| MMSE | 29.4±.81 | 29.3±.64 | 29.5±.76 | 29.5±.76 | 29.4±.74 | no | NS |
| Beck Dep. | 10.4±3.00 | 8.9±2.34 | 6.7±2.08 | 11.7±2.20 | 9.4±3.04 | no | H =31.474  *P* <.001  η2[H] = .37 |
| EQ5D | 75.3±5.50 | 80.3±4.72 | 87.5±4.44 | 74.3±5.45 | 79.3±7.24 | no | H =40.797  *P* <.001  η2[H] = .50 |
| BBS | 42.2±3.33 | 49.3±4.63 | 55.1±1.65 | 42.9±4.84 | 47.4±6.48 | no | H =52.126  *P* <,001  η2[H] = .65 |
| 6MWT (m) | 346.5±46.71 | 385.5±40.06 | 395.5±44.07 | 353.0±49.85 | 370.1±49.13 | yes | F =5.622  *P* =.002  η2 = .18 |
| VAP | 38.0±8.70 | 21.1±5.65 | 14.4±3.56 | 37.4±6.00 | 27.7±12.00 | no | H =59.468  *P* <.001  η2[H] = .74 |
| DGI | 20.6±1.60 | 21.6±1.35 | 22.9±.91 | 20.8±1.02 | 21.5±1.53 | no | H =29.964  *P* <.001  η2[H] = .35 |
| Fn | .3±.47 | .1±.31 | .1±.22 | .3±.47 | .2±.39 | no | NS |
| Sway WEO | 9.8±3.39 | 8.9±2.69 | 7.4±1.90 | 8.5±3.29 | 8.7±2.96 | yes | NS |
| Sway WEC | 13.5±2.22 | 10.6±3.59 | 8.6±2.44 | 10.7±5.49 | 10.9±4.01 | yes | F =6.120  *P* =.001  η2 = .19 |
| Sway NEO | 12.0±3.06 | 10.4±3.48 | 8.1±1.67 | 10.5±3.66 | 10.3±3.32 | no | H =16.556  *P* =.001  η2[H] = .18 |
| Sway NEC | 14.7±3.05 | 12.9±2.79 | 9.0±3.23 | 12.3±3.89 | 12.2±3.81 | yes | F =10.471  *P* <.001  η2 = .29 |
| Abbreviations: BDI, Beck Depression Inventory; AHR BE , Average heart rate before exercise; SBP mmHg 15 MBT, Systole average 15 measurements before training; DBP mmHg 15 MBT, Dyastole average 15 measurements before training; DGI 1, Dynamic Gait Index 1; Fn, Falls number; BBS, Berg Balance Scale; VAP 1; BMI, body mass index; MMSE, Mini-Mental State Examination; NEC, COP path while standing in a narrow stance with eyes closed; NEO, COP path while standing in a narrow stance with eyes open; WEC, COP path while standing in a wide stance with eyes  closed; WEO, COP path while standing in a wide stance with eyes open; ND = Normal distribution (Kolmogorov-Smirnov teszt alapján)  *: significant difference between means  NS: not significant  BMI: Body Mass Index  AHR BE , Average heart rate before exercise  SBP mmHg 15 MBT: Systole average 15 measurements before training  DBP mmHg 15 MBT: Dyastole average 15 measurements before training  BBS: Berg Balance Scale  DGI 1: Dynamic Gait Index 1  Fn: Falls number  Data are expressed as mean +/- SD. | | | | | | | | |
