# Supplementary material for: Effects of high-intensity virtual reality therapy on coordination and quality of life in BPPV patients: A randomized clinical trial
Source: Research Square preprint supplement (doi:10.21203/rs.3.rs-6999386/v1), 2025-07-10
Supplement: Supplementary file 4 [file f4f22daaac1c82e2850ef187.docx]

| **Table 1** Group comparisons at baseline PRE. | | | | | | ND | Result of Group Comparison |
| --- | --- | --- | --- | --- | --- | --- | --- |
| Variable | BET (n=20) | VES (n=20) | EXE (n=20) | CON (n=20) | All (N=80) |
| Mean±SD | Mean±SD | Mean±SD | Mean±SD | Mean±SD |
| Mass (kg) | 68.7±11.14 | 74.7±9.05 | 71.7±13.73 | 72.9±9.60 | 72.0±11.04 | yes | NS |
| BMI, kg/m2 | 22.7±3.31 | 24.1±2.67 | 24.0±3.17 | 24.1±2.66 | 23.7±2.96 | yes | NS |
| MMSE | 28.9±0.93 | 28.7±1.09 | 28.3±1.30 | 28.8±1.07 | 28.6±1.11 | no | NS |
| Beck Dep. | 11.5±3.17 | 12.5±3.05 | 11.8±2.40 | 13.4±2.60 | 12.3±2.86 | no | NS |
| EQ5D | 65.0±5.13 | 64.0±5.98 | 65.0±5.13 | 65.0±5.13 | 64.8±5.27 | no | NS |
| BBS | 40.7±3.51 | 41.4±4.26 | 40.5±3.09 | 41.0±3.68 | 40.9±3.61 | no | NS |
| 6MWT (m) | 332.0±26.87 | 351.5±48.04 | 334.5±52.66 | 342.0±55.21 | 340.0±46.77 | no | NS |
| VAP | 39.0±8.44 | 40.8±7.10 | 41.6±7.44 | 41.3±7.68 | 40.6±7.60 | yes | NS |
| DGI | 18.9±1.48 | 18.4±2.18 | 18.7±1.39 | 18.9±1.69 | 18.7±1.70 | no | NS |
| Fn | 0.6±0.68 | 0.5±0.51 | 0.7±0.75 | 0.5±0.61 | 0.6±0.63 | no | NS |
| Sway WEO | 10.1±4.15 | 10.3±4.14 | 10.1±3.61 | 10.2±4.38 | 10.2±4.00 | yes | NS |
| Sway WEC | 14.2±2.91 | 14.4±3.11 | 14.6±3.94 | 12.2±3.39 | 13.9±3.44 | yes | NS |
| Sway NEO | 13.1±2.64 | 12.8±3.19 | 12.9±3.46 | 12.9±3.66 | 12.9±3.20 | yes | NS |
| Sway NEC | 15.2±3.33 | 15.5±2.77 | 16.2±3.56 | 16.4±3.09 | 15.8±3.18 | yes | NS |
| Abbreviations: BDI, Beck Depression Inventory; AHR BE , Average heart rate before exercise; SBP mmHg 15 MBT, Systole average 15 measurements before training; DBP mmHg 15 MBT, Dyastole average 15 measurements before training; DGI 1, Dynamic Gait Index 1; Fn, Falls number; BBS, Berg Balance Scale; VAP 1; BMI, body mass index; MMSE, Mini-Mental State Examination; NEC, COP path while standing in a narrow stance with eyes closed; NEO, COP path while standing in a narrow stance with eyes open; WEC, COP path while standing in a wide stance with eyes  closed; WEO, COP path while standing in a wide stance with eyes open; ND = Normal distribution (Kolmogorov-Smirnov teszt alapján)  *: significant difference between means  NS: not significant  BMI: Body Mass Index  AHR BE , Average heart rate before exercise  SBP mmHg 15 MBT: Systole average 15 measurements before training  DBP mmHg 15 MBT: Dyastole average 15 measurements before training  BBS: Berg Balance Scale  DGI 1: Dynamic Gait Index 1  Fn: Falls number  Data are expressed as mean +/- SD. | | | | | | | | |
